# Supplementary material for: Synthesis and Structure–Activity Studies of β-Barrel Assembly Machine Complex Inhibitor MRL-494
Source: PubMed Central journal article supplement (PMC9673140; doi:10.1021/acsinfecdis.2c00459), 2022-11-01

Supporting Information for:

# Synthesis and structure-activity studies of BAM complex inhibitor MRL-494

Nicola Wade,<sup>a</sup> Charlotte M. J. Wesseling,<sup>a</sup> Paolo Innocenti,<sup>a</sup> Cornelis J. Slingerland,<sup>a</sup> Gregory M. Koningstein,<sup>b</sup> Joen Luirink,<sup>b</sup> and Nathaniel I. Martin<sup>\*a</sup>

<sup>a</sup>*Biological Chemistry Group, Institute of Biology Leiden, Leiden University, 2333 BE Leiden, The Netherlands.*

<sup>b</sup>*Department of Molecular Microbiology, Amsterdam Institute of Molecular and Life Sciences (AIMMS), Vrije Universiteit, 1081HV Amsterdam, The Netherlands.*

\*n.i.martin@biology.leidenuniv.nl

## Table of Contents

|     |       |                                                |
|-----|-------|------------------------------------------------|
| S2  | ..... | General information                            |
| S3  | ..... | Synthesis                                      |
| S4  | ..... | Gram-positive MIC results                      |
| S4  | ..... | Checkerboard results                           |
| S5  | ..... | Synergy plots                                  |
| S7  | ..... | Hemolysis data                                 |
| S9  | ..... | Rcs stress response data                       |
| S10 | ..... | <sup>1</sup> H and <sup>13</sup> C NMR spectra |
| S14 | ..... | Analytical RP-HPLC data                        |

## General information

HRMS analysis was performed on a Shimadzu Nexera X2 UHPLC system with a Waters Acquity HSS C18 column ( $2.1 \times 100$  mm,  $1.8 \mu\text{m}$ ) at  $30^\circ\text{C}$  and equipped with a diode array detector. The following solvent system, at a flow rate of  $0.5$  mL/min, was used: solvent A,  $0.1\%$  formic acid in water; solvent B,  $0.1\%$  formic acid in acetonitrile. Gradient elution was as follows:  $95:5$  (A/B) for  $1$  min,  $95:5$  to  $15:85$  (A/B) over  $6$  min,  $15:85$  to  $0:100$  (A/B) over  $1$  min,  $0:100$  (A/B) for  $3$  min, then reversion back to  $95:5$  (A/B) for  $3$  min. This system was connected to a Shimadzu  $9030$  QTOF mass spectrometer (ESI ionisation) calibrated internally with Agilent's API-TOF reference mass solution kit ( $5.0$  mM purine,  $100.0$  mM ammonium trifluoroacetate and  $2.5$  mM hexakis(1H,1H,3H-tetrafluoropropoxy)phosphazine) diluted to achieve a mass count of  $10000$ .

HPLC analyses were performed on a Shimadzu Prominence-i LC-2030 system with a Dr. Maisch Reprosil Gold  $120$  C18 column ( $4.6 \times 250$  mm,  $5$  or  $10 \mu\text{m}$ ) at  $30^\circ\text{C}$  and equipped with a UV detector monitoring at X and Y nm. The following solvent system, at a flow rate of  $1$  mL/min, was used: solvent A,  $0.1\%$  TFA in water/acetonitrile  $95:5$ ; solvent B,  $0.1\%$  TFA in water/acetonitrile  $5/95$ . Gradient elution was as follows:  $95:5$  (A/B) for  $2$  min,  $95:5$  to  $0:100$  (A/B) over  $13$  min,  $0:100$  (A/B) for  $2$  min, then reversion back to  $95:5$  (A/B) over  $1$  min,  $95:5$  (A/B) for  $2$  min.

Preparative HPLC runs were performed on a BESTA-Technik system with a Dr. Maisch Reprosil Gold  $120$  C18 column ( $25 \times 250$  mm,  $10 \mu\text{m}$ ) and equipped with a ECOM Flash UV detector monitoring at X nm. The following solvent system, at a flow rate of  $12$  mL/min, was used: solvent A,  $0.1\%$  TFA in water/acetonitrile  $95:5$ ; solvent B,  $0.1\%$  TFA in water/acetonitrile  $5/95$ . Gradient elution was as follows:  $95:5$  (A/B) for  $2$  min,  $95:5$  to  $0:100$  (A/B) over  $13$  min,  $0:100$  (A/B) for  $2$  min, then reversion back to  $95:5$  (A/B) over  $1$  min,  $95:5$  (A/B) for  $2$  min.

## Building block synthesis

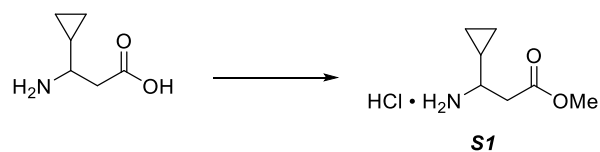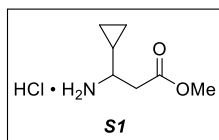

(±)-Methyl 3-amino-3-cyclopropylpropanoate (**S1**). (±)-3-amino-3-cyclopropyl-propanoic acid (500 mg, 3.87 mmol, 1 eq) was dissolved in

methanol (15 mL) and cooled to 0 °C. Thionyl chloride (600 μL, 8.25 mmol, 2.1 eq) was added dropwise to the solution and stirred for 3 h before gradually warming to room temperature. The reaction was stirred for a further 18 h and monitored by TLC (99.5/0.5 DCM/NEt<sub>3</sub>). When the reaction was complete, the solvent was removed and mixture coevaporated with toluene (3 x 10 mL) to give a white solid (quant). This was used in the next step without further purification.

<sup>1</sup>H NMR (400 MHz, MeOD) δ 3.74 (s, 3H), 2.93 – 2.77 (m, 3H), 1.13 – 1.02 (m, 1H), 0.76 – 0.64 (m, 2H), 0.57 – 0.50 (m, 1H), 0.44 – 0.37 (m, 1H). <sup>13</sup>C NMR (101 MHz, MeOD) δ 172.2, 55.1, 52.7, 37.9, 14.5, 4.8, 4.4. HRMS (ESI): calculated for C<sub>7</sub>H<sub>14</sub>NO<sub>2</sub> [M+H]<sup>+</sup> 144.1019, found 144.1020.

**Table S1.** Gram-positive bacteria MIC results.

| Strain              | <b>1</b> | <b>13</b> | <b>16</b> | <b>17</b> |
|---------------------|----------|-----------|-----------|-----------|
| <i>MSSA</i> 29213   | 8        | 64        | 128       | >128      |
| <i>MRSA</i> USA 300 | 8        | 64        | 128       | >128      |

**Table S2.** Results of **13** checkerboard assays in combination with rifampicin.

| Strain                          | MIC ( $\mu\text{g/mL}$ ) |                          |                  |                           | FICI         |
|---------------------------------|--------------------------|--------------------------|------------------|---------------------------|--------------|
|                                 | <b>13</b> alone          | <b>13</b> in combination | Rifampicin alone | Rifampicin in combination |              |
| <i>E. coli</i> ATCC 25922       | >128                     | 32                       | 2                | 0.125                     | $\leq 0.188$ |
| <i>E. coli</i> BW25113          | 64                       | 32                       | 4                | 0.125                     | 0.281        |
| <i>K. pneumoniae</i> ATCC 13883 | >128                     | 16                       | 8                | 1                         | $\leq 0.125$ |
| <i>A. baumannii</i> ATCC 9955   | >128                     | 16                       | 1                | 0.125                     | $\leq 0.188$ |
| <i>P. Aeruginosa</i> ATCC 27853 | >128                     | -                        | 16               | -                         | -            |

**Table S3.** Results of **16** checkerboard assays in combination with rifampicin.

| Strain                          | MIC ( $\mu\text{g/mL}$ ) |                          |                  |                           | FICI         |
|---------------------------------|--------------------------|--------------------------|------------------|---------------------------|--------------|
|                                 | <b>16</b> alone          | <b>16</b> in combination | Rifampicin alone | Rifampicin in combination |              |
| <i>E. coli</i> ATCC 25922       | 128                      | 16                       | 2                | 0.125                     | 0.188        |
| <i>E. coli</i> BW25113          | 128                      | 16                       | 4                | 0.25                      | 0.186        |
| <i>K. pneumoniae</i> ATCC 13883 | >128                     | 16                       | 8                | 1                         | $\leq 0.125$ |
| <i>A. baumannii</i> ATCC 9955   | >128                     | 16                       | 1                | 0.125                     | $\leq 0.188$ |
| <i>P. Aeruginosa</i> ATCC 27853 | 128                      | -                        | 16               | -                         | -            |

**Table S4.** Results of **17** checkerboard assays in combination with rifampicin.

| Strain                          | MIC ( $\mu\text{g/mL}$ ) |                          |                  |                           | FICI |
|---------------------------------|--------------------------|--------------------------|------------------|---------------------------|------|
|                                 | <b>17</b> alone          | <b>17</b> in combination | Rifampicin alone | Rifampicin in combination |      |
| <i>E. coli</i> ATCC 25922       | >128                     | -                        | 2                | -                         | -    |
| <i>E. coli</i> BW25113          | >128                     | -                        | 4                | -                         | -    |
| <i>K. pneumoniae</i> ATCC 13883 | >128                     | -                        | 8                | -                         | -    |
| <i>A. baumannii</i> ATCC 9955   | >128                     | -                        | 1                | -                         | -    |
| <i>P. Aeruginosa</i> ATCC 27853 | >128                     | -                        | 16               | -                         | -    |

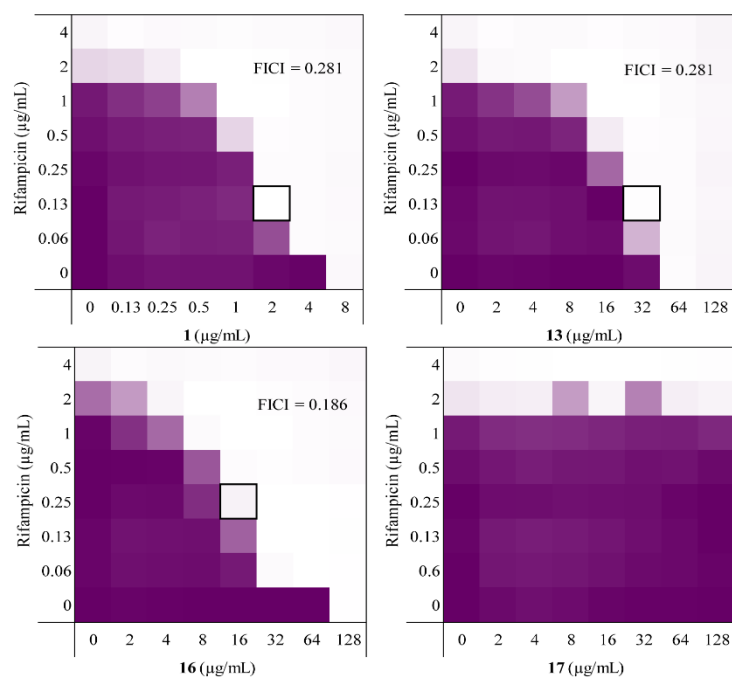

**Figure S1.** Checkerboard assay results for MRL-494 (**1**) and analogues (**13**, **16**, and **17**) in combination with rifampicin against *E. coli* BW25113. The combination of test compound and rifampicin which resulted in the lowest FICI is indicated by a black box. The mean optical density of the bacterial growth (OD600) is shown as a colour gradient, with purple signifying maximum bacterial growth and white as no growth.

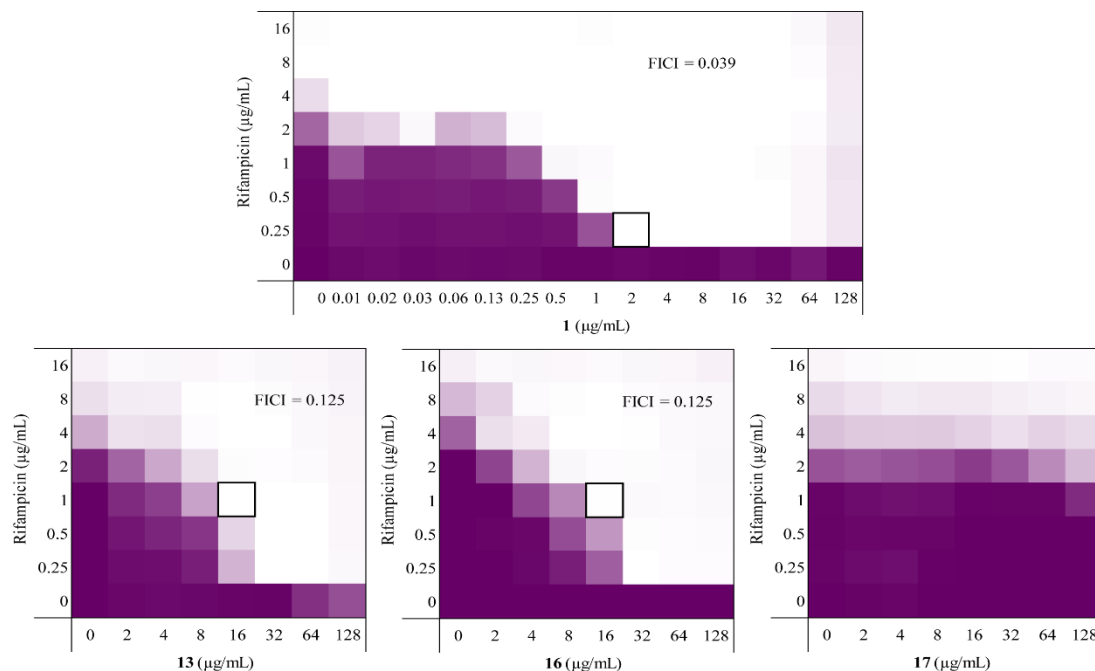

**Figure S2.** Checkerboard assay results for MRL-494 (**1**) and analogues (**13**, **16**, and **17**) in combination with rifampicin against *K. pneumoniae* ATCC 13883. The combination of test compound and rifampicin which resulted in the lowest FICI is indicated by a black box. The mean optical density of the bacterial growth (OD600) is shown as a colour gradient, with purple signifying maximum bacterial growth and white as no growth.

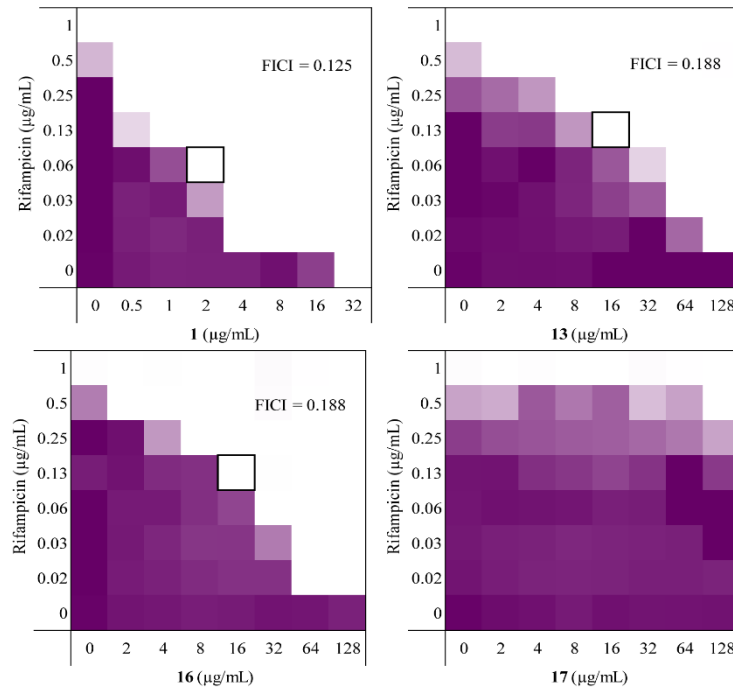

**Figure S3.** Checkerboard assay results for MRL-494 (**1**) and analogues (**13**, **16**, and **17**) in combination with rifampicin against *A. baumannii* ATCC 9955. The combination of test compound and rifampicin which resulted in the lowest FICI is indicated by a black box. The mean optical density of the bacterial growth (OD600) is shown as a colour gradient, with purple signifying maximum bacterial growth and white as no growth.

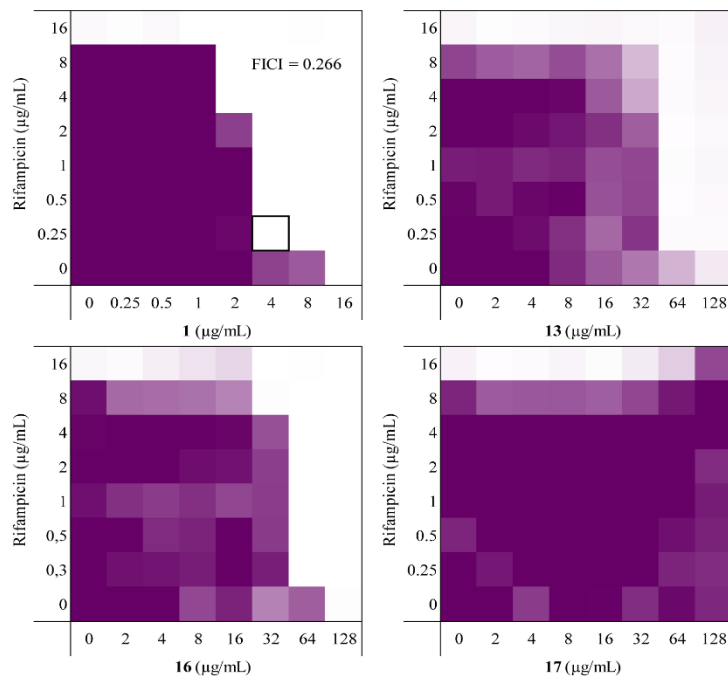

**Figure S4.** Checkerboard assay results for MRL-494 (**1**) and analogues (**13**, **16**, and **17**) in combination with rifampicin against *P. aeruginosa* ATCC 27853. The combination of test compound and rifampicin which resulted in the lowest FICI is indicated by a black box. The mean optical density of the bacterial growth (OD600) is shown as a colour gradient, with purple signifying maximum bacterial growth and white as no growth.

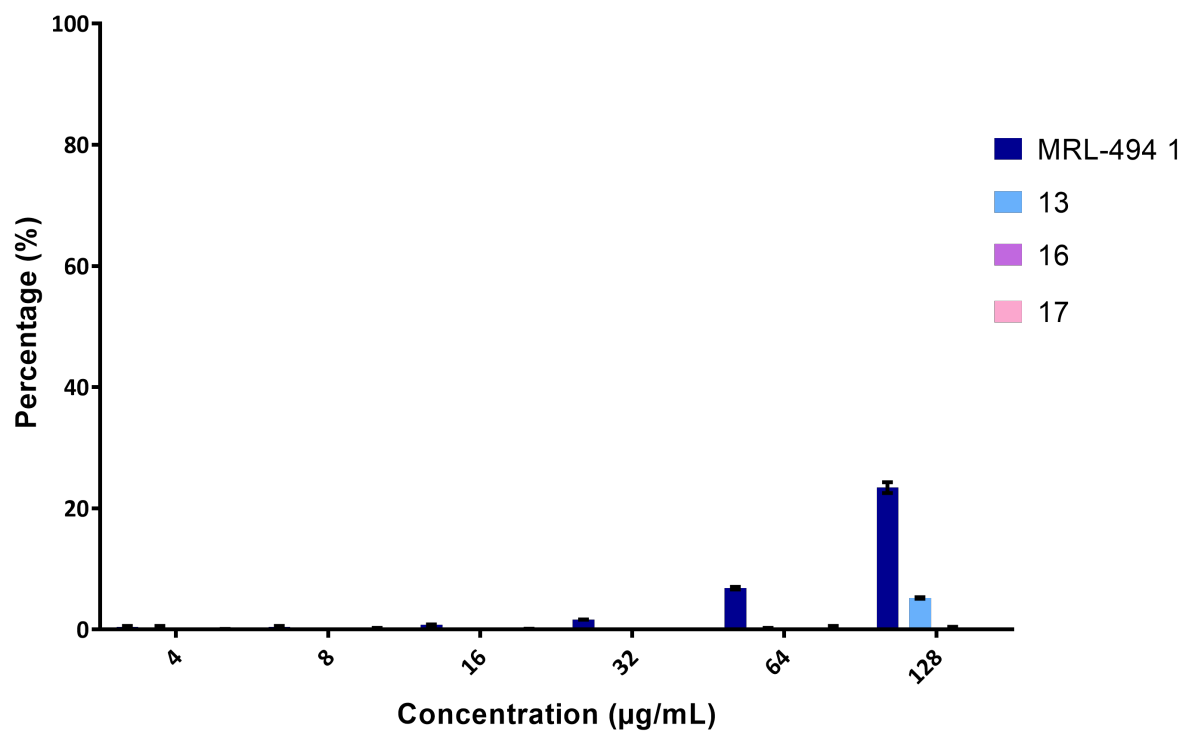

**Figure S5.** Hemolytic activity of all test compounds after 18 hours of incubation. A description of the hemolysis assay is found in the materials and methods. Error bars are calculated based on n=3 technical replicates.

**Table S5.** Hemolysis data points

| Compound         | Concentration (µg/mL) |      |      |      |      |      |
|------------------|-----------------------|------|------|------|------|------|
|                  | 128                   | 64   | 32   | 16   | 8    | 4    |
| MRL-494 <b>1</b> | 23.4                  | 6.8  | 1.6  | 0.8  | 0.4  | 0.4  |
| <b>13</b>        | 5.2                   | 0.2  | -0.3 | -0.4 | -0.2 | 0.3  |
| <b>16</b>        | 0.3                   | -0.4 | -0.5 | -0.4 | -0.3 | -0.3 |
| <b>17</b>        | 0.0                   | 0.2  | -0.1 | 0.0  | 0.1  | 0.0  |

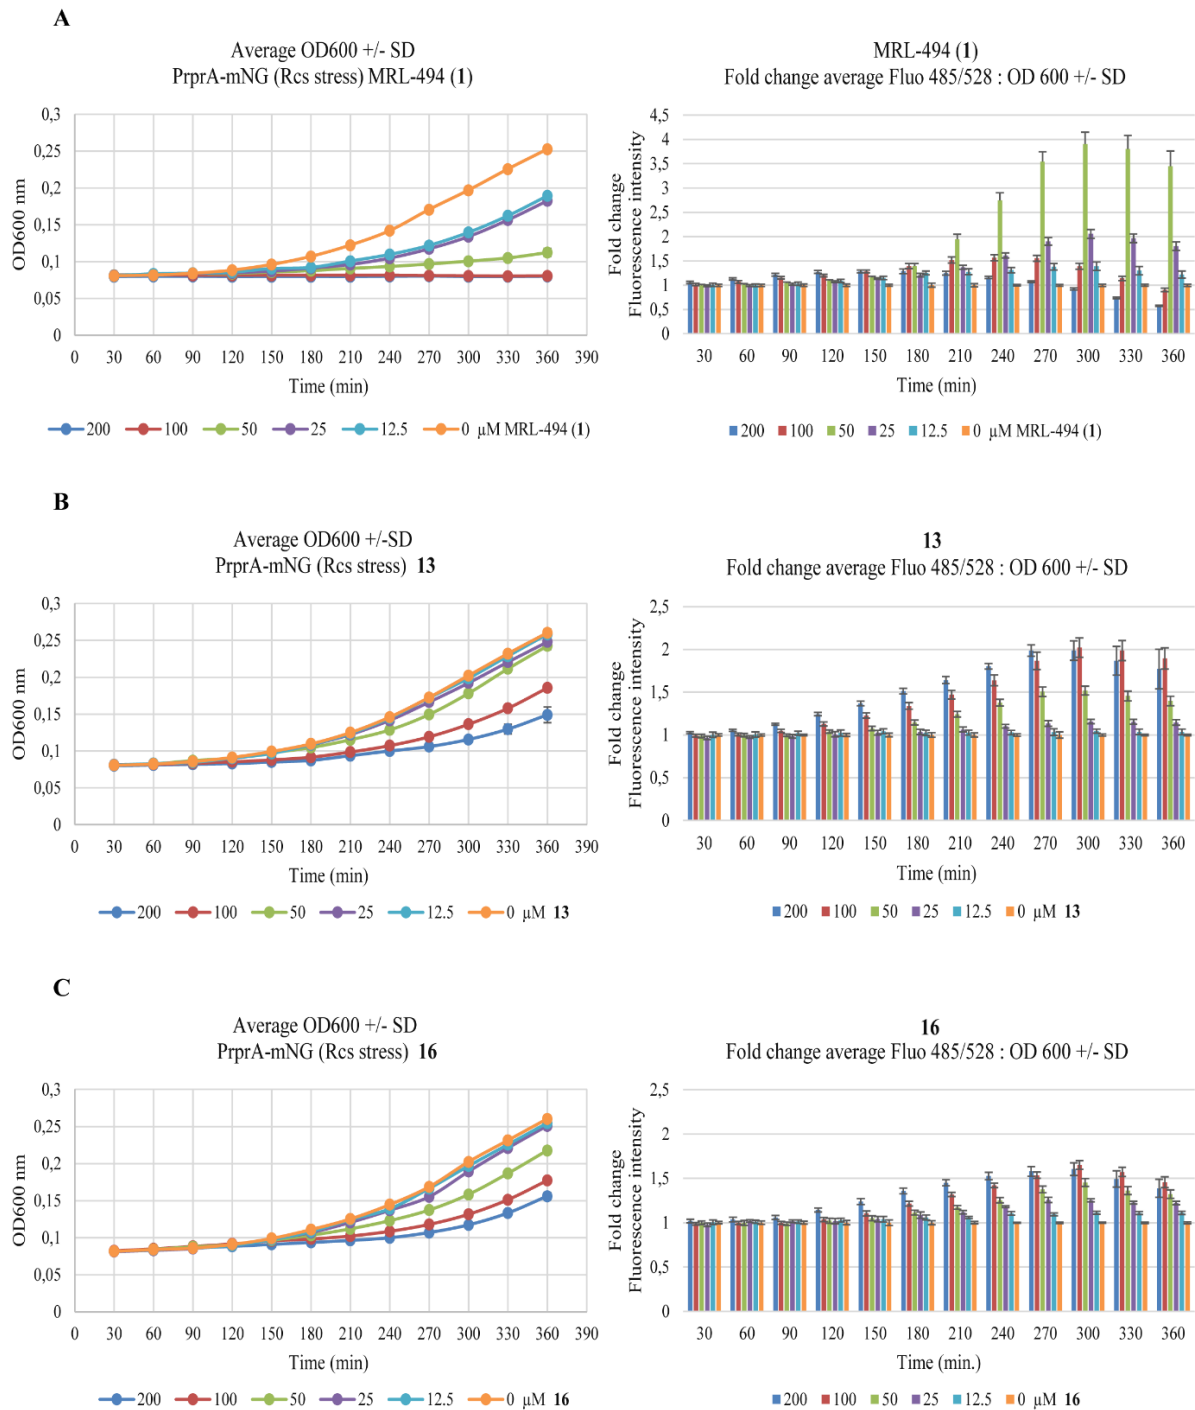

**Figure S6.** Real-time monitoring of bacterial growth and Rcs stress activation in response to MRL-494 1 and analogues (13 and 16). *E. coli* TOP10F<sup>7</sup> cells, harboring the PrprA-mNG reporter construct, were grown in a 96-well plate and exposed to the compounds at the indicated concentration at timepoint 0. Growth (OD<sub>600</sub>) and mNG fluorescence were measured in time. Fluorescence was corrected for growth (OD<sub>600</sub>) and plotted as fold-change of signal compared to untreated cells (set to 1). Error bars represent the standard deviation of triplicate technical replicates.



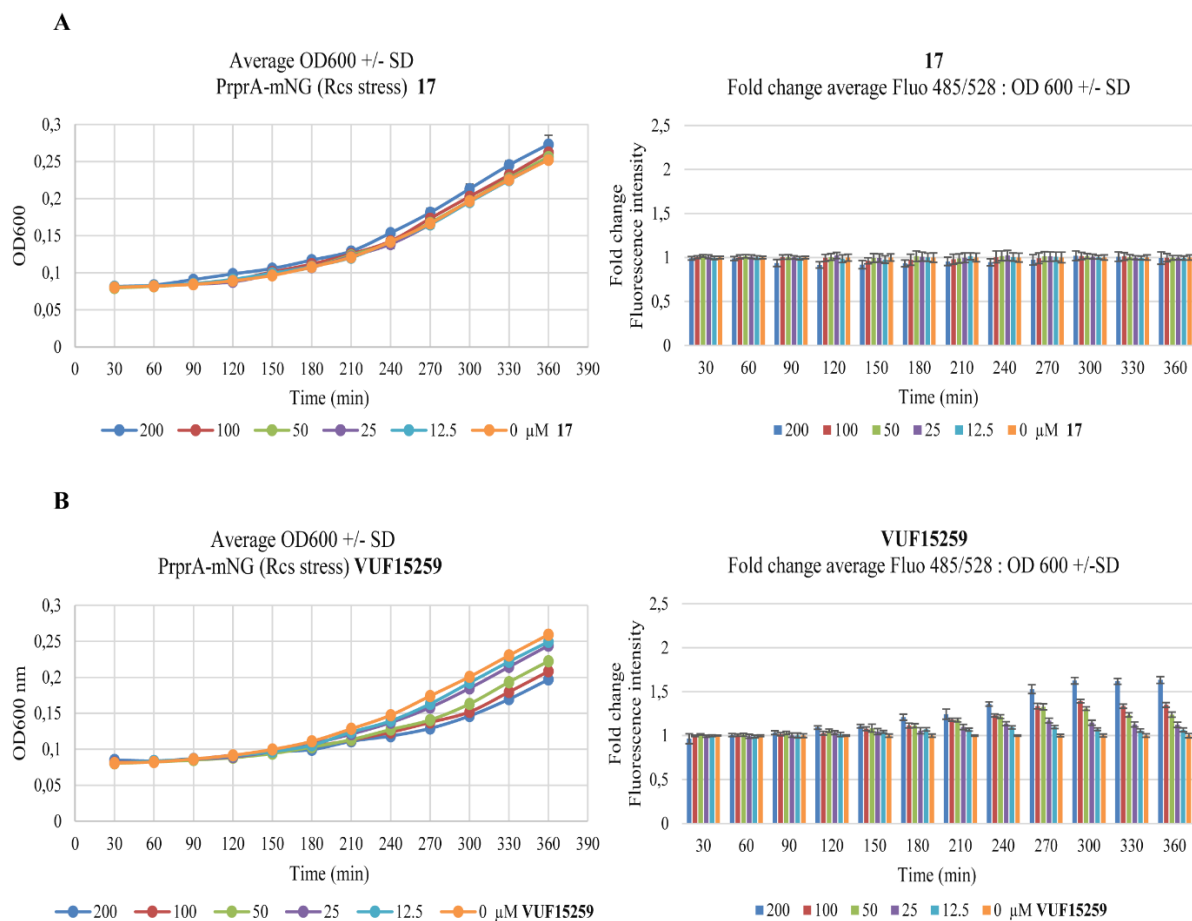

**Figure S7.** Real-time monitoring of bacterial growth and Rcs stress activation in response to MRL-494 analogue **17** and known BAM complex inhibitor VUF15259 **3**. *E. coli* TOP10F<sup>+</sup> cells, harboring the PrprA-mNG reporter construct, were grown in a 96-well plate and exposed to the compounds at the indicated concentration at timepoint 0. Growth (OD<sub>600</sub>) and mNG fluorescence were measured in time. Fluorescence was corrected for growth (OD<sub>600</sub>) and plotted as fold-change of signal compared to untreated cells (set to 1). Error bars represent the standard deviation of triplicate technical replicates.

$^1\text{H}$  and  $^{13}\text{C}$  NMR spectra for MRL-494 (1)

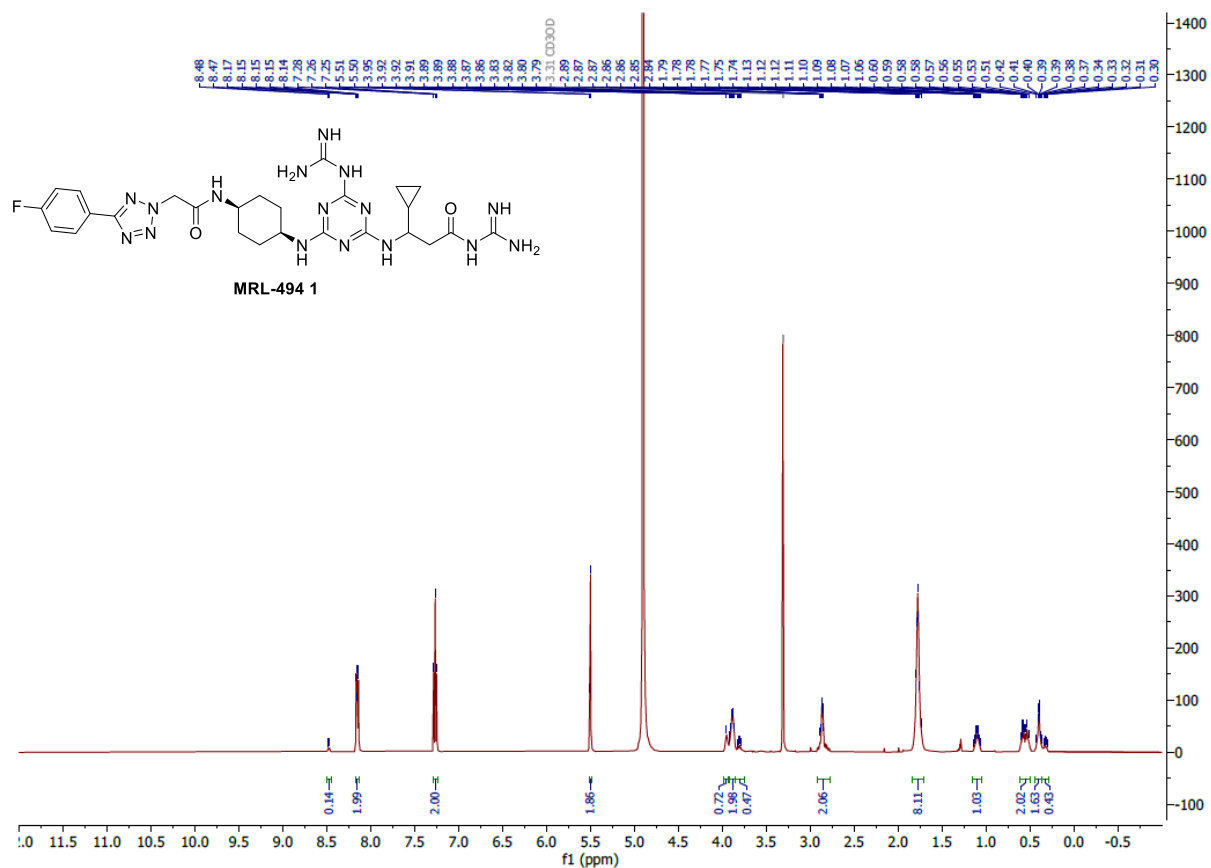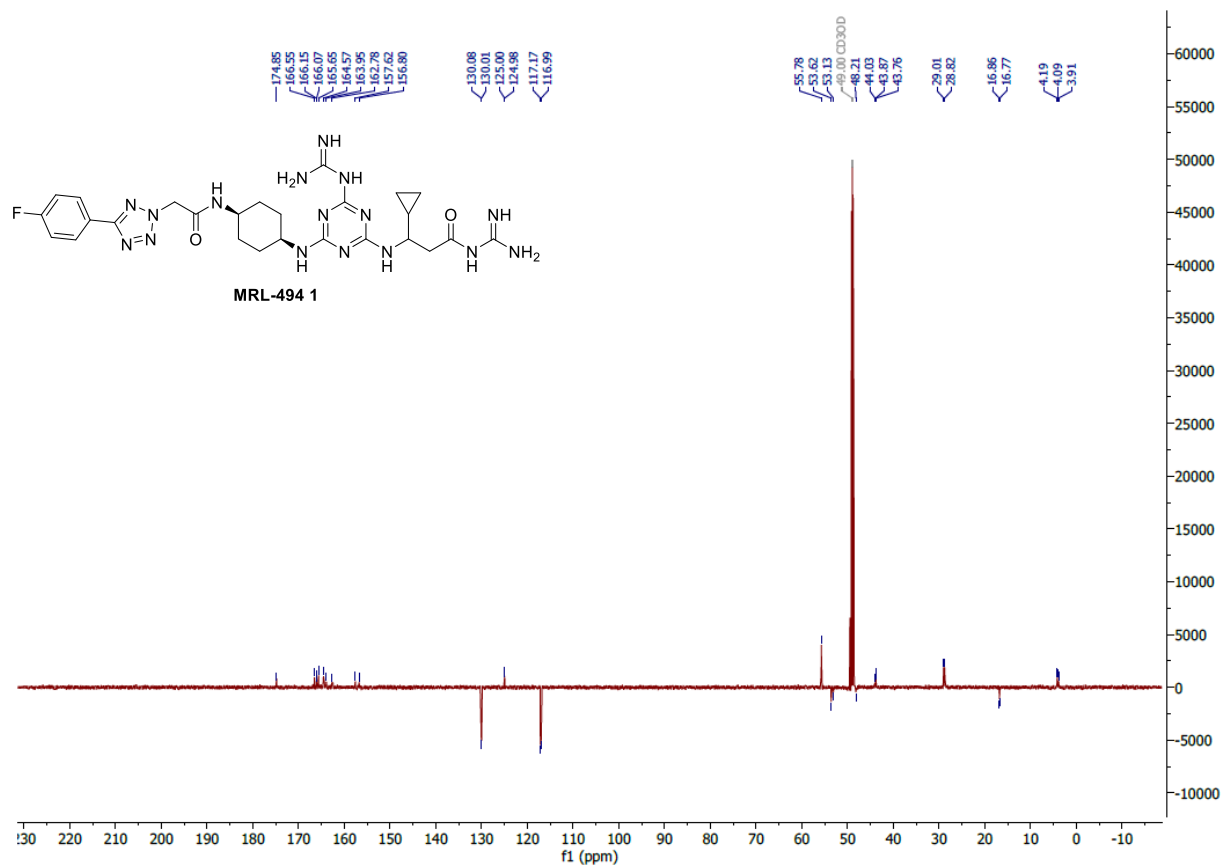

$^1\text{H}$  and  $^{13}\text{C}$  NMR spectra for compound **13**

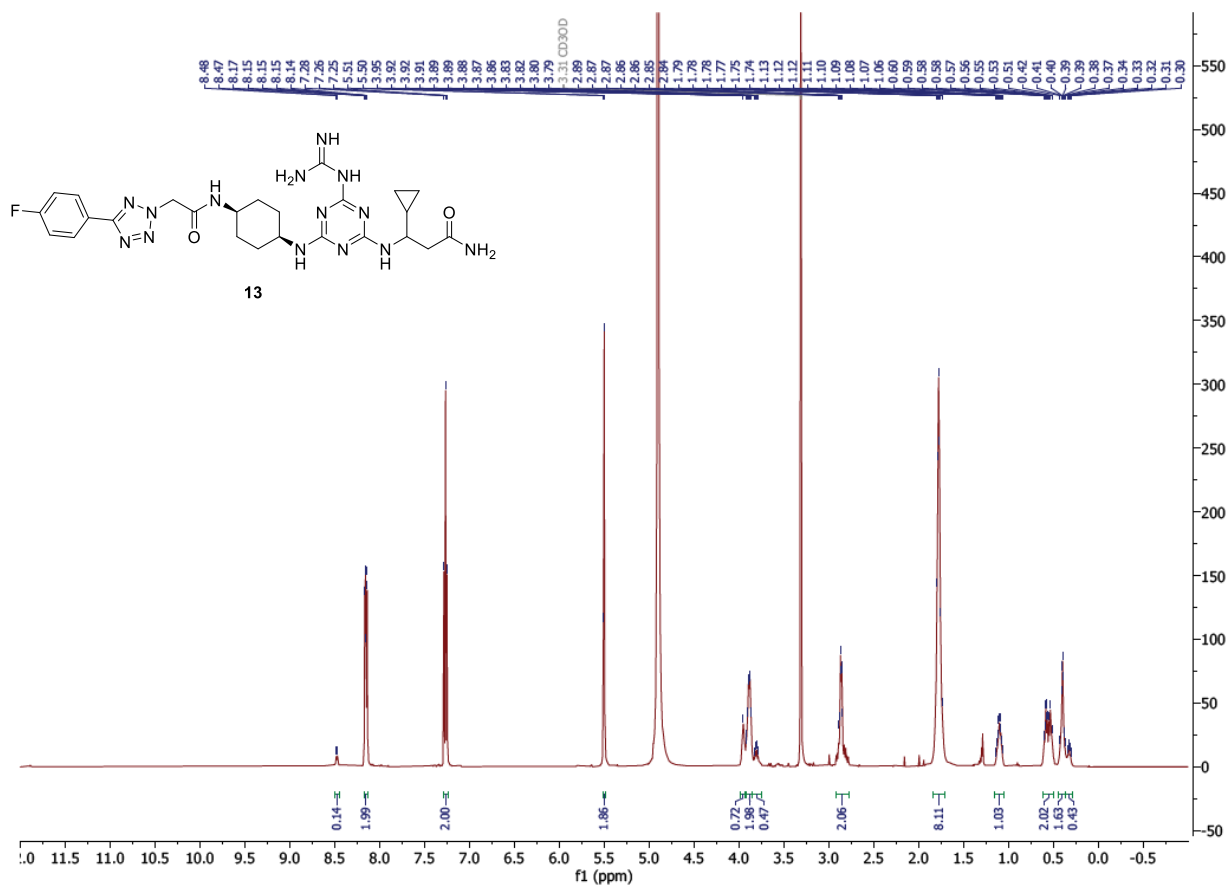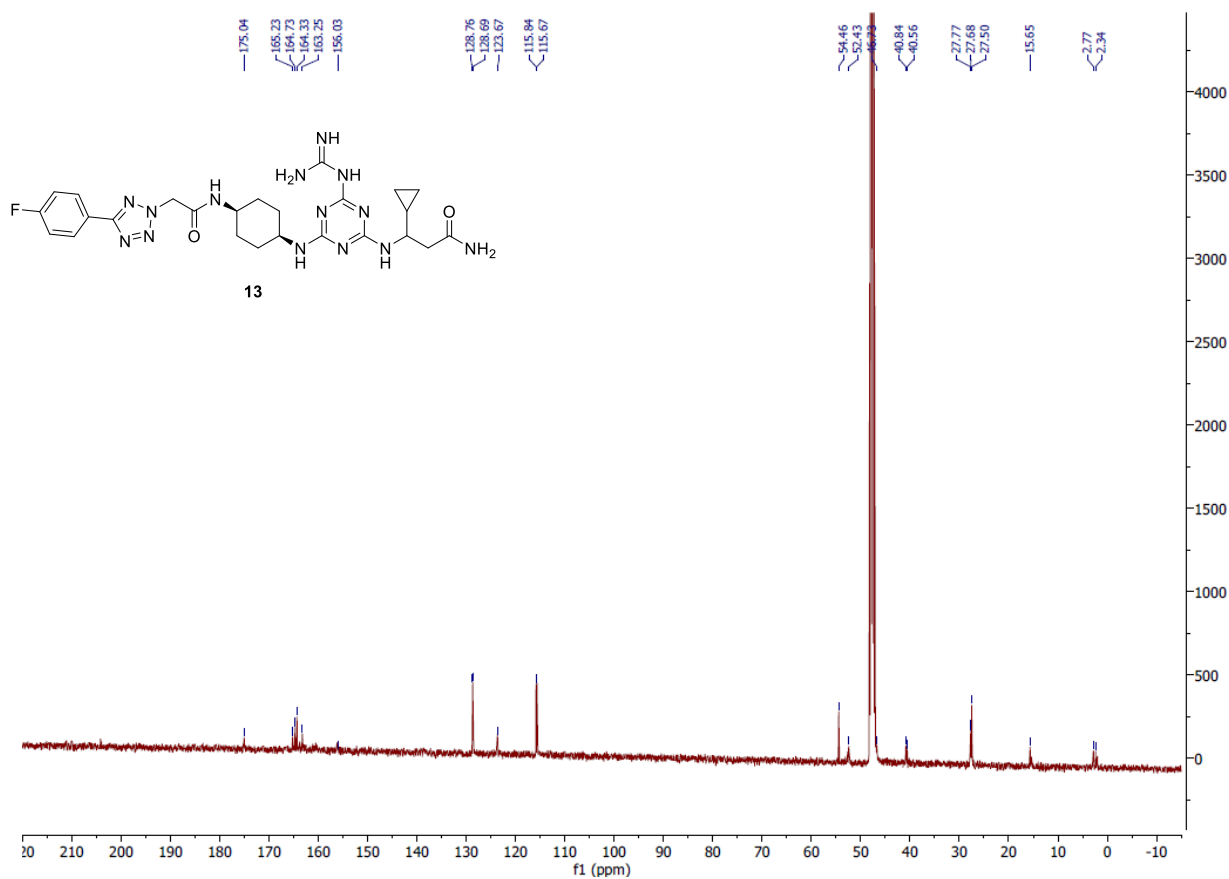

$^1\text{H}$  and  $^{13}\text{C}$  NMR spectra for compound **16**

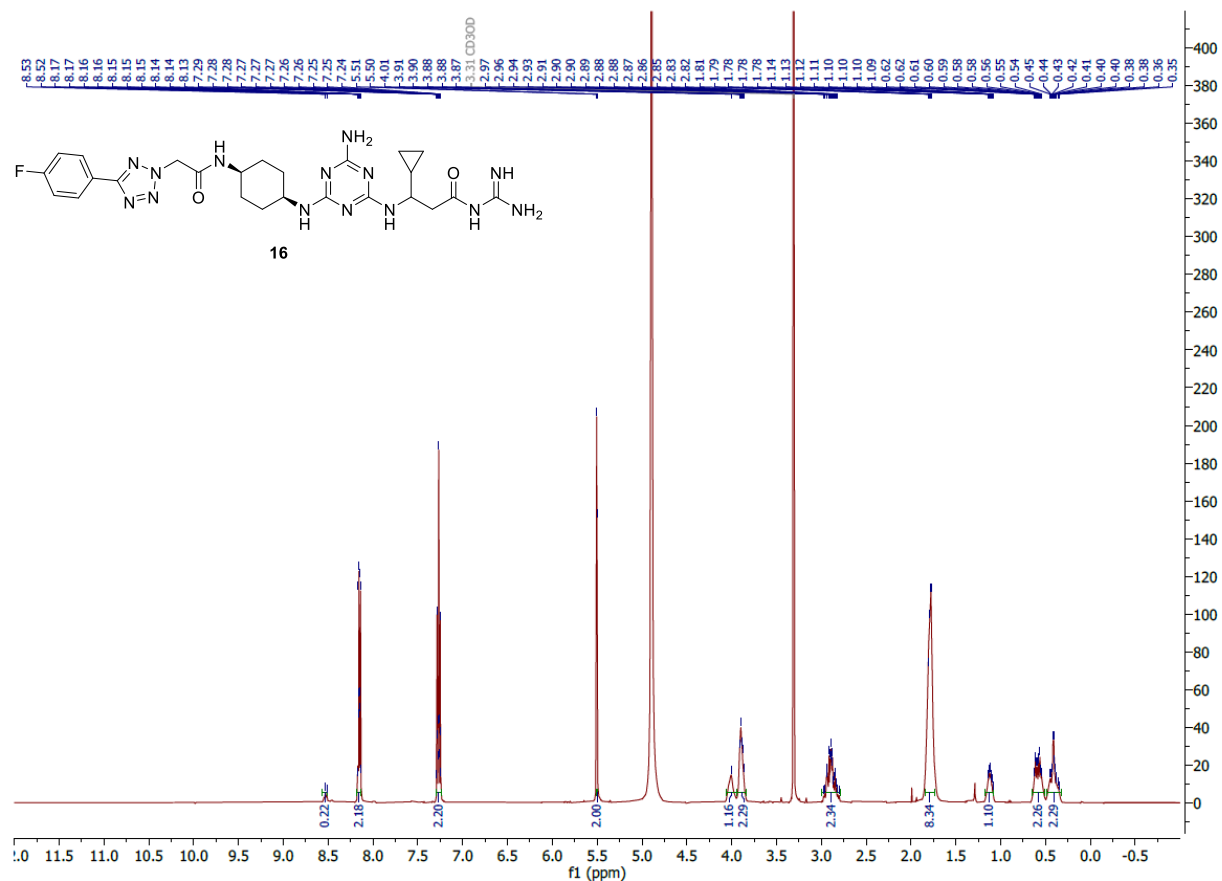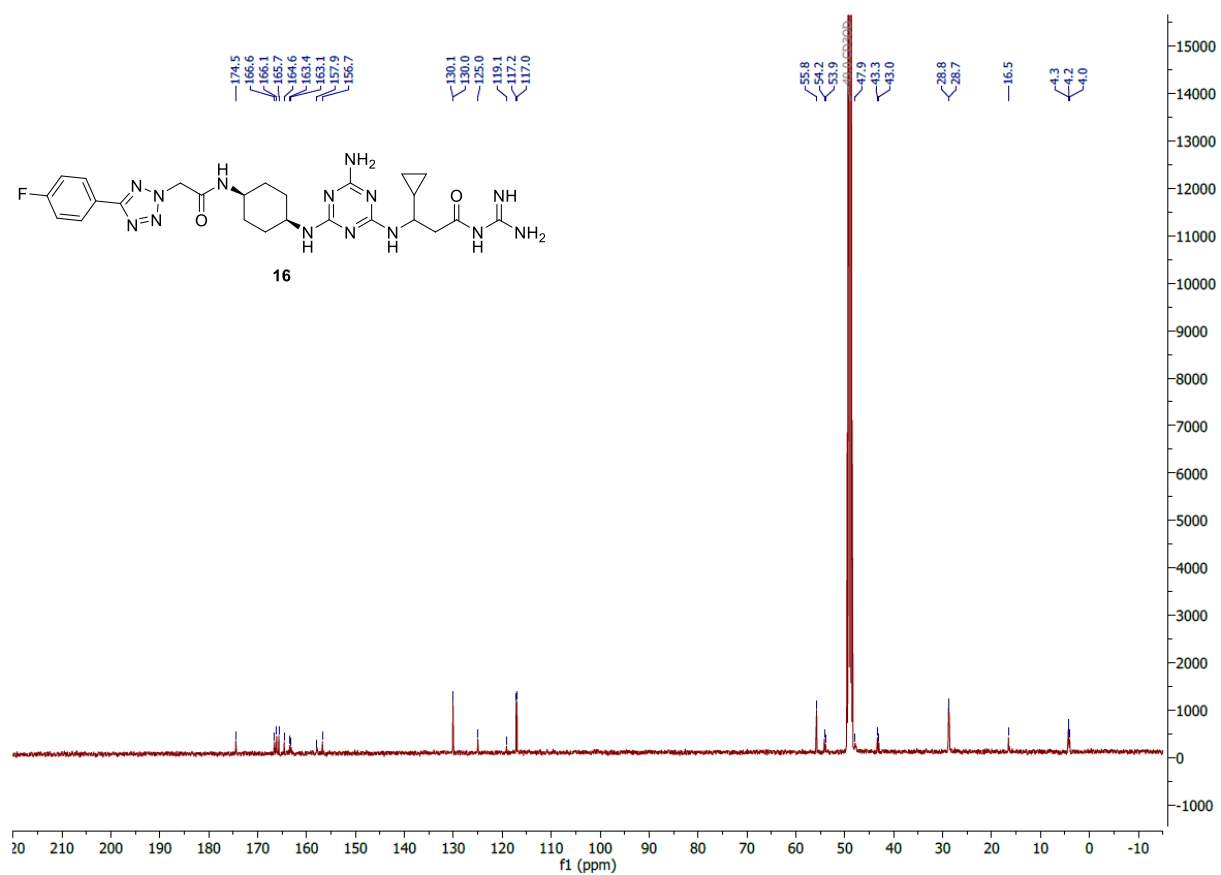

$^1\text{H}$  and  $^{13}\text{C}$  NMR spectra for compound **17**

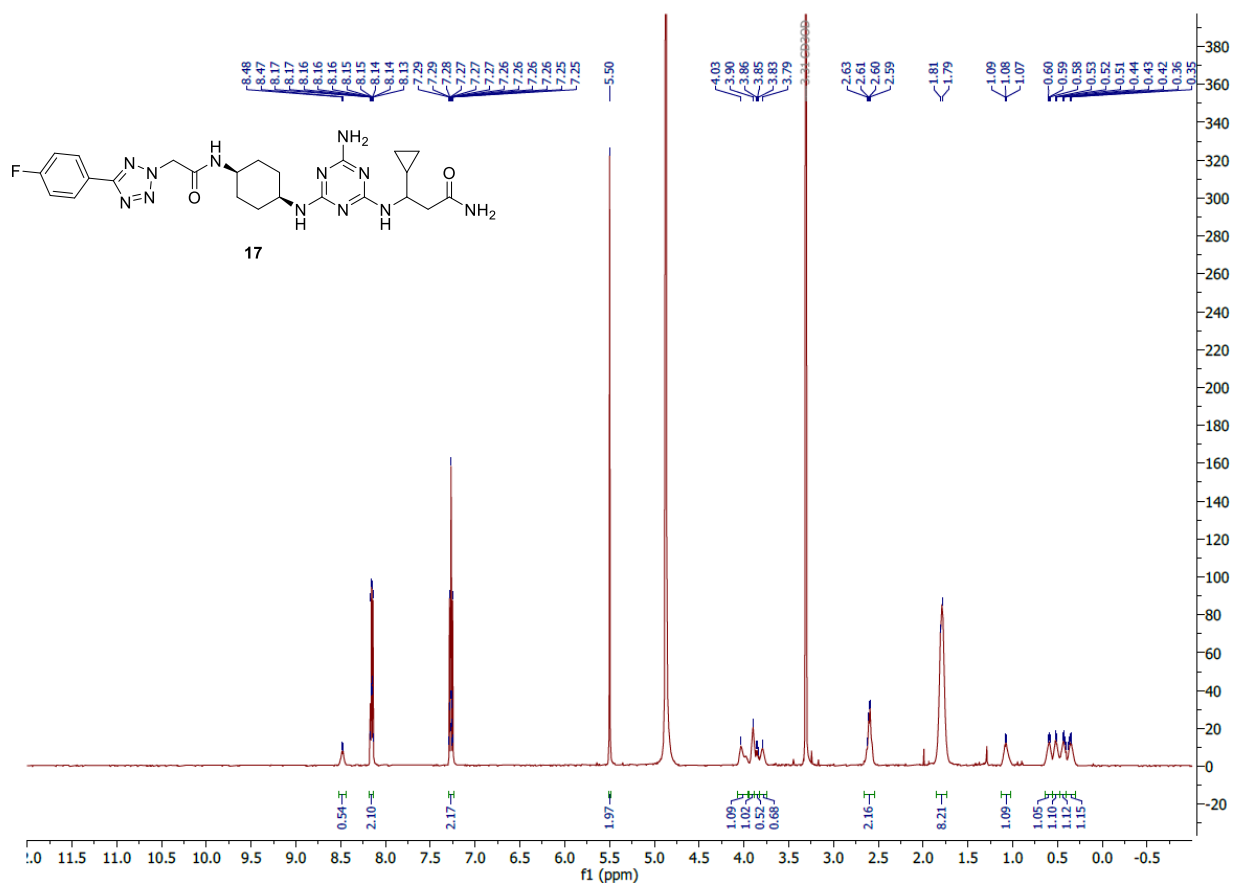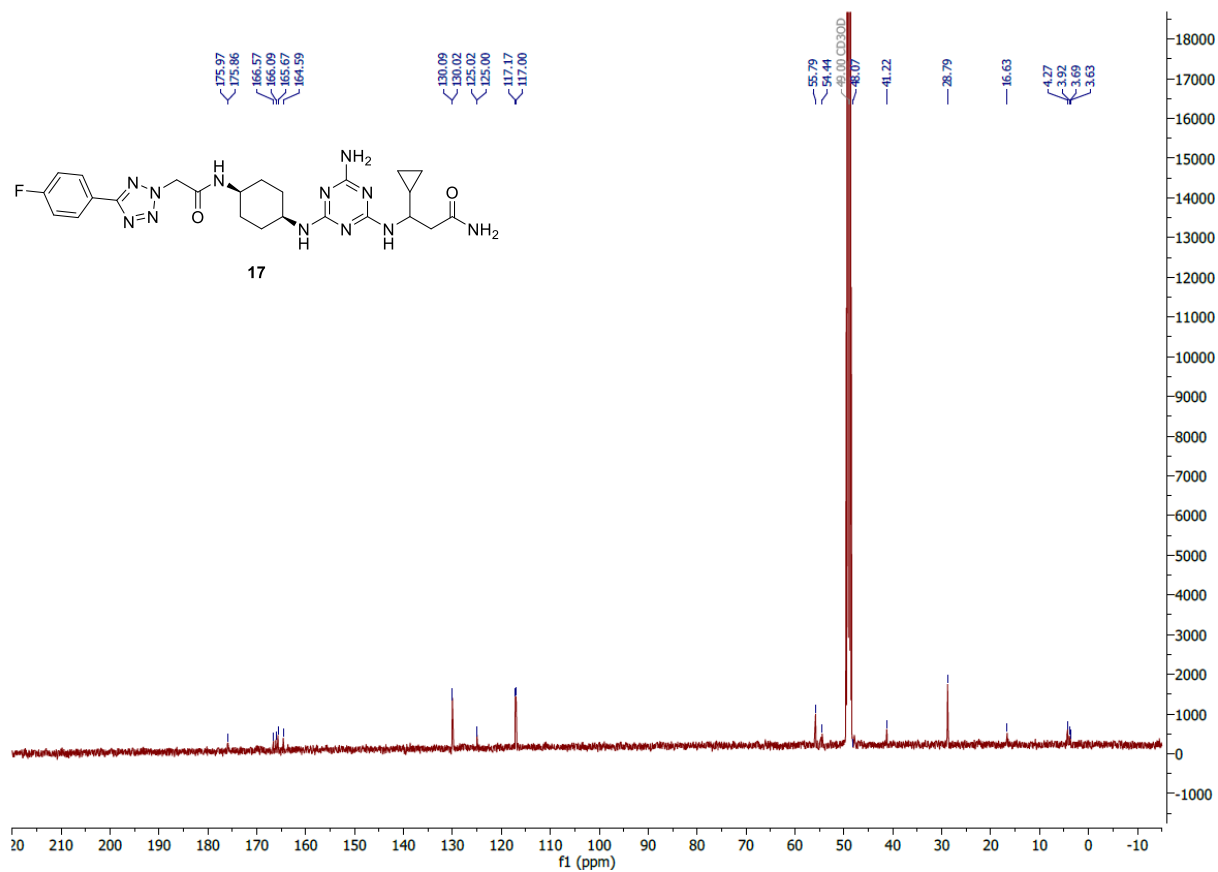

Analytical RP-HPLC data for compound MRL-494 (1)

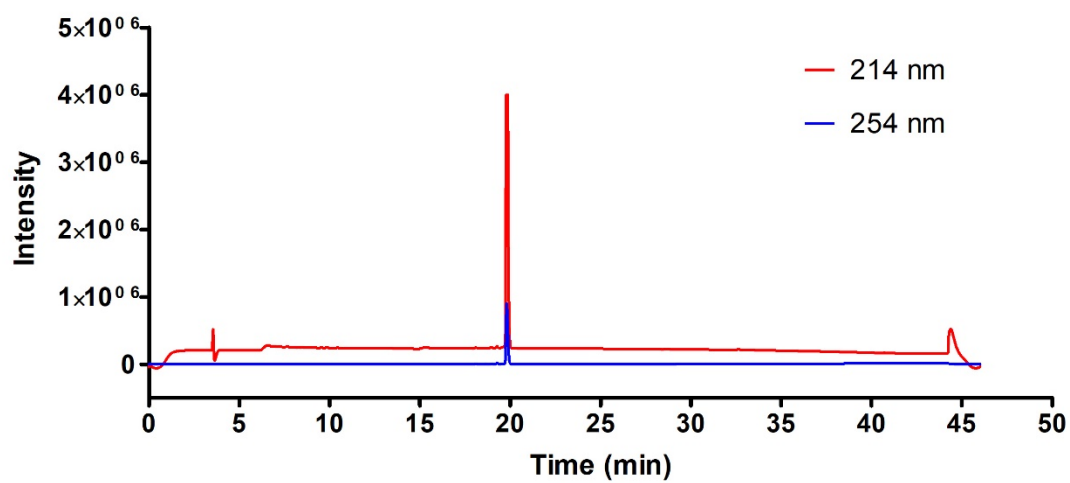

Analytical RP-HPLC data for compound 13

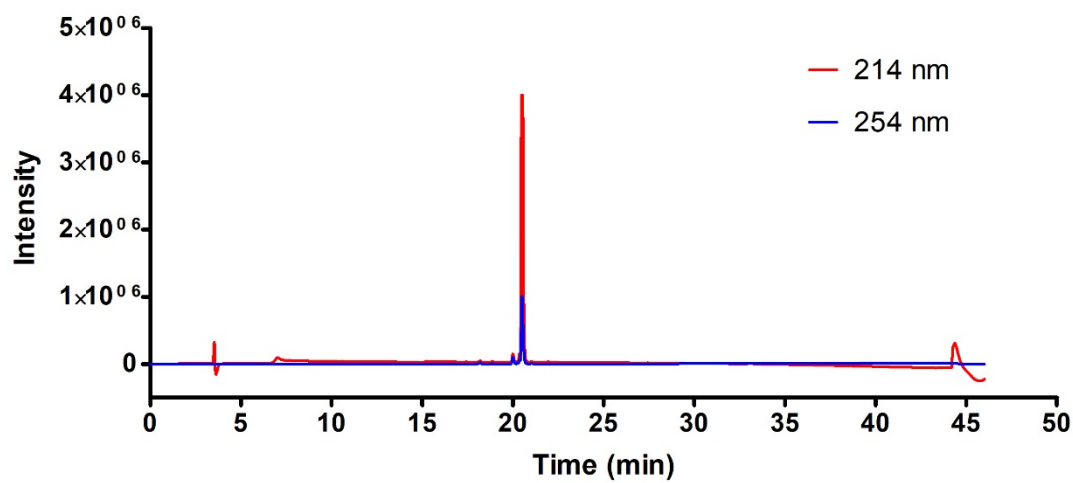

Analytical RP-HPLC data for compound **16**

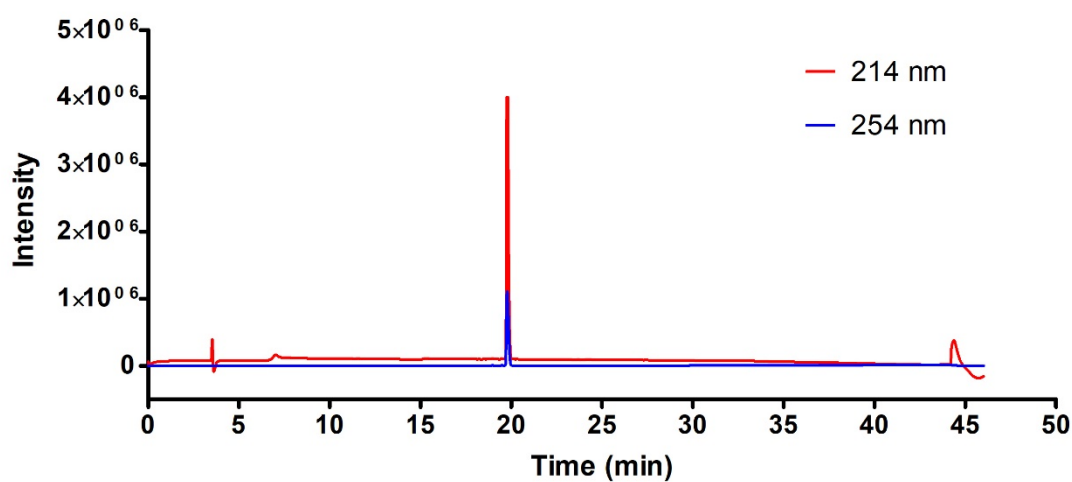

Analytical RP-HPLC data for compound **17**

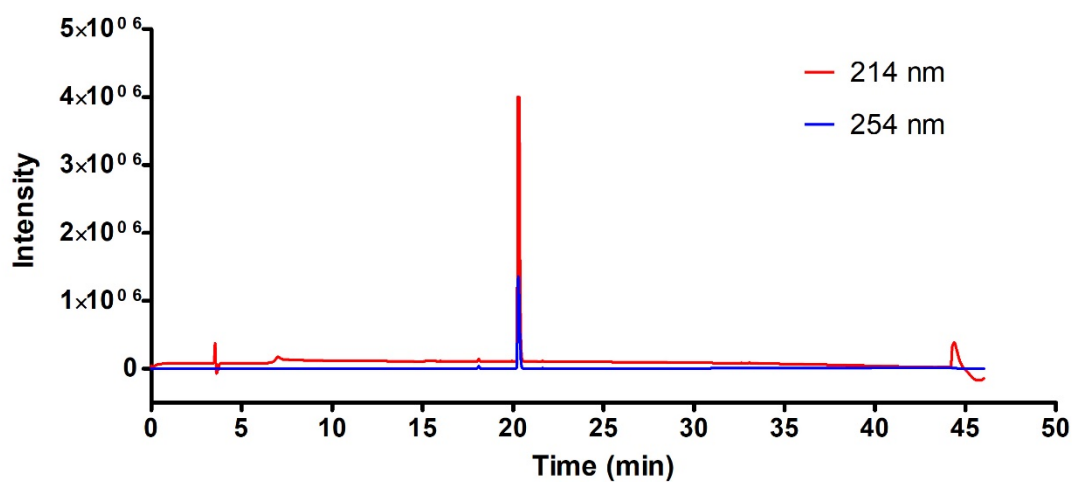

Supplement: id2c00459_si_001.pdf [file id2c00459_si_001.pdf]
